# Supplementary material for: Unusual seedless approach to gold nanoparticle synthesis: application to selective rapid naked eye detection of mercury(ii)
Source: Royal Society of Chemistry journal article supplement (doi:10.1039/c4an00480a), 2014-01-01
Supplement: c4an00480a1.pdf [file c4an00480a1.pdf]

## Supporting Information

### Newly made observation in seed-mediated approach and its application for highly selective rapid naked eye detection of mercury (II)

**Sukeri Anandhakumar and Jayaraman Mathiyarasu\***

Electrodes and Electrocatalysis Division,  
CSIR-Central Electrochemical Research Institute,  
Karaikudi – 630006, Tamil Nadu, India.  
Fax: 04565-227779; Tel:04565-241340;  
E-mail: al\_mathi@yahoo.com.

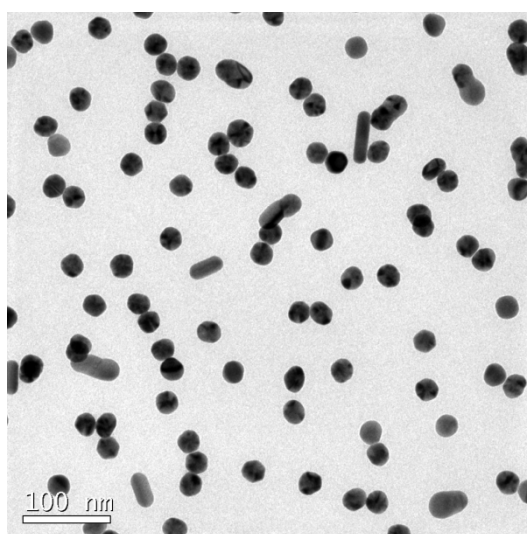

**Fig.S1:** Low magnification TEM image of 1:2 ratio HAuCl<sub>4</sub>:Ascorbic acid
